# Supplementary material for: The product-controllable aerobic oxidative cleavage of vicinal diols using vanadium-based photocatalysts
Source: Royal Society of Chemistry journal article supplement (doi:10.1039/d1re00566a), 2022-01-01
Supplement: d1re00566a1.pdf [file d1re00566a1.pdf]

# A sustainable and product-controllable aerobic oxidative cleavage of vicinal diols using vanadium-based photocatalyst

Guobao Yang, Jing Shi, Haijing Sun, Xinli Tong\*

Tianjin Key Laboratory of Organic Solar Cells and Photochemical Conversion, School of Chemistry & Chemical Engineering, Tianjin University of Technology, Tianjin 300384, P. R. China. Tel: (+86)-22-60214259; E-mail: tongxinli@tju.edu.cn or tongxli@sohu.com.

## Supporting Information

### 1. The characterization of catalysts

#### 1.1 Photoelectrochemical detection of different catalysts

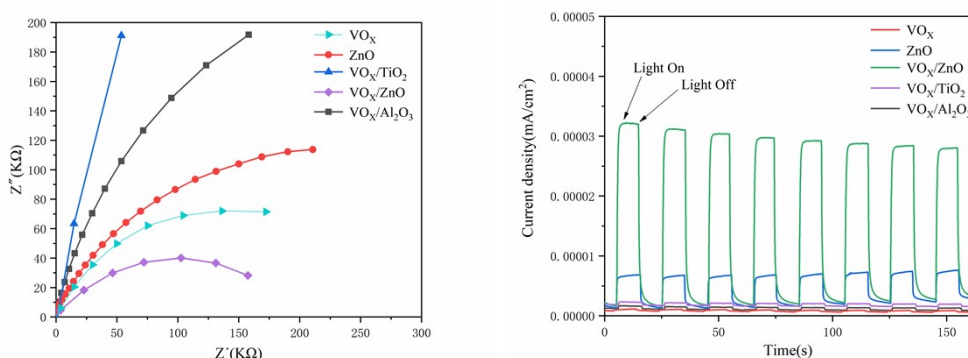

Figure S1. The photocurrent density spectra (left) and EIS Nyquist plots (right) of different samples

#### 1.2 SEM image

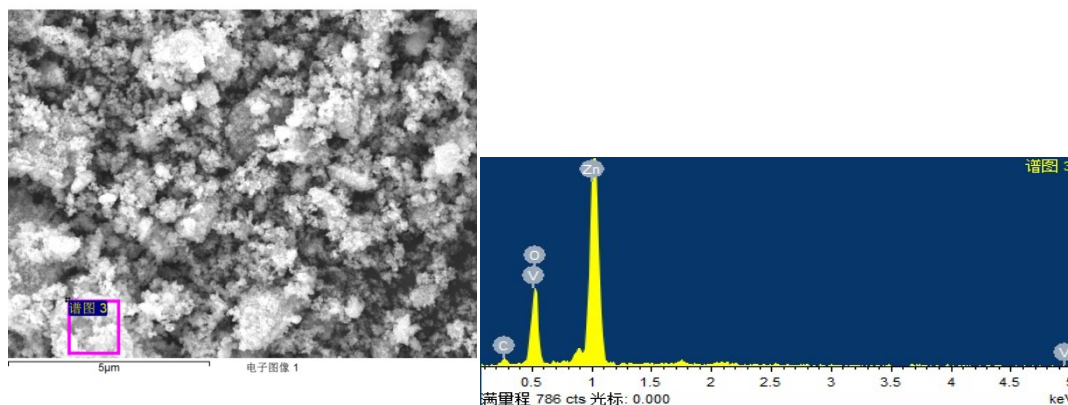

Figure S2. The SEM image of  $\text{VO}_x/\text{ZnO}$  sample

### 1.3 XPS spectrum of VO<sub>x</sub>/ZnO photocatalyst

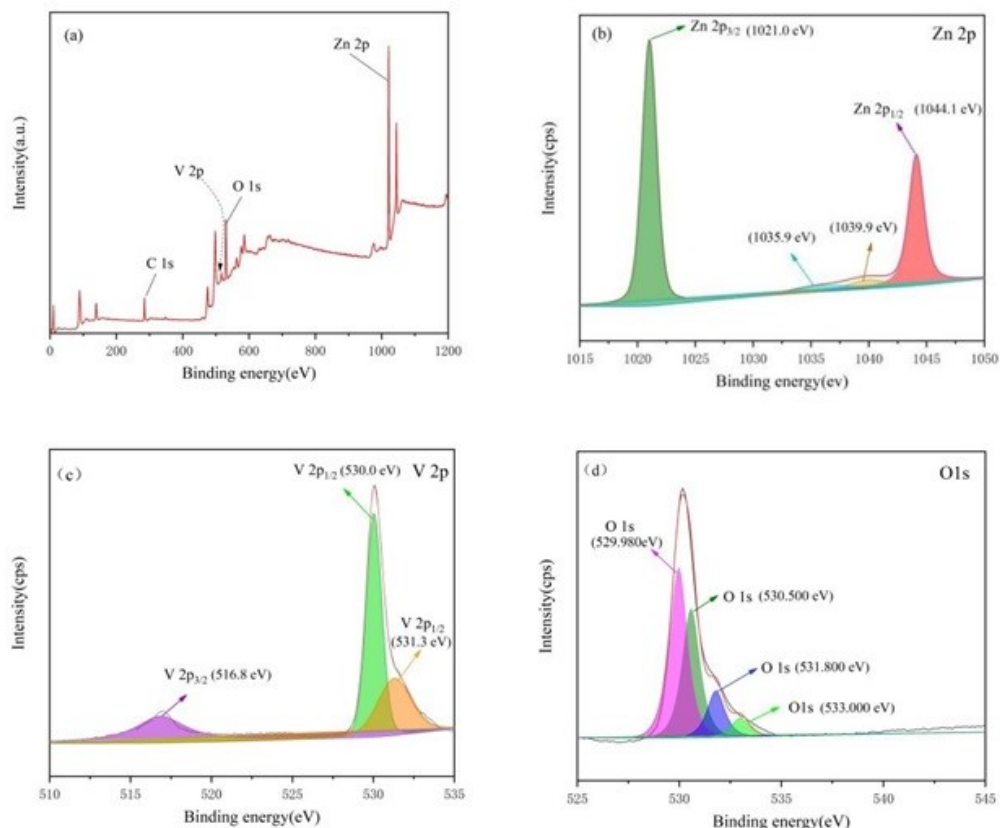

**Figure S3.** The XPS spectrum of VO<sub>x</sub>/ZnO sample (a) and the results of Zn2p core (b), V2p core (c), O1s core (d)

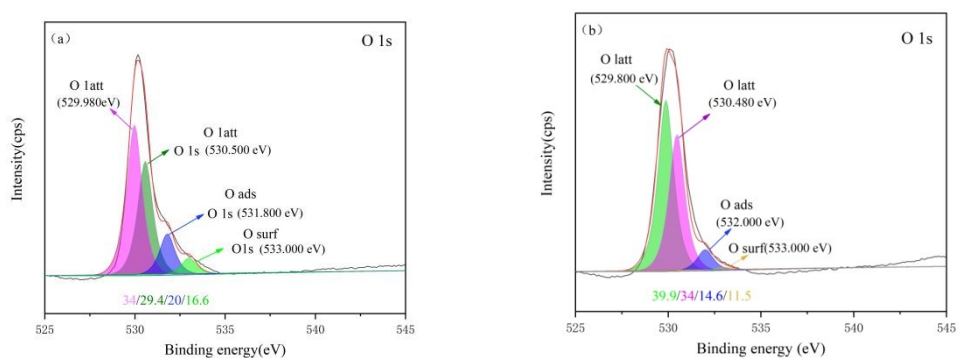

**Figure S4.** The comparison of XPS result of O1s core for the VO<sub>x</sub>/ZnO and VO<sub>x</sub>/ZrO<sub>2</sub> catalysts

### 1.4 The UV-vis spectra and NH<sub>3</sub>-TPD data of different catalysts

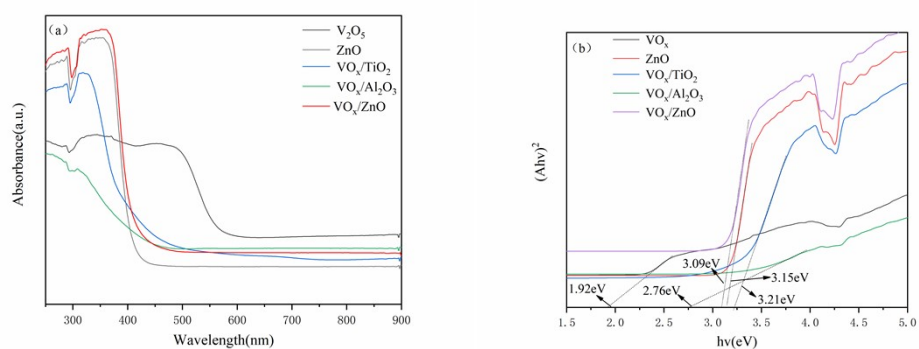

**Figure S5.** The UV-vis spectra (a) and the band gap energy (b) of different photocatalysts

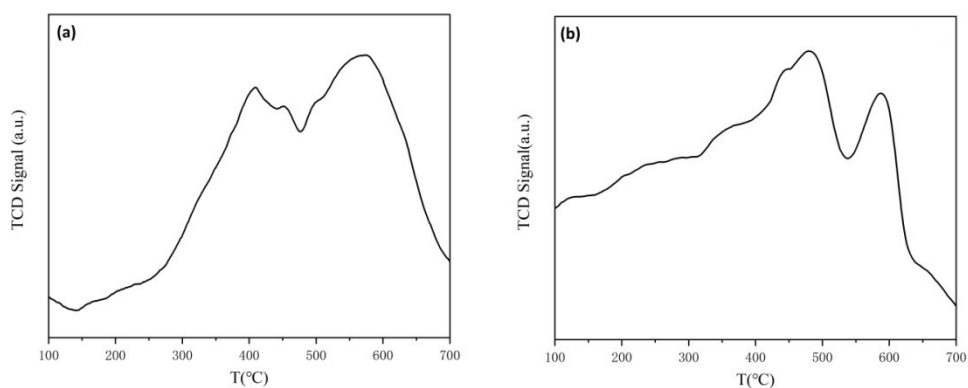

**Figure S6.** The  $\text{NH}_3$ -TPD result of ZnO sample (a) and  $\text{VO}_x/\text{ZnO}$  photocatalyst (b)

## 1.5 BET detection

**Table S1.** The  $\text{N}_2$  physisorption results of different catalysts

| Catalyst                 | Surface area ( $\text{m}^2/\text{g}$ ) | Pore Volume ( $\text{m}^3/\text{g}$ ) | Pore Size ( $\text{\AA}$ ) |
|--------------------------|----------------------------------------|---------------------------------------|----------------------------|
| ZnO                      | 19.5776                                | 0.000831                              | 71.0930                    |
| $\text{VO}_x/\text{ZnO}$ | 18.1030                                | 0.00120                               | 51.210                     |
| $\text{VO}_x$            | 2.5210                                 | 0.000613                              | 48.266                     |

## 2. The influence of oxygen pressure on the oxidative cleavage process of vicinal diols

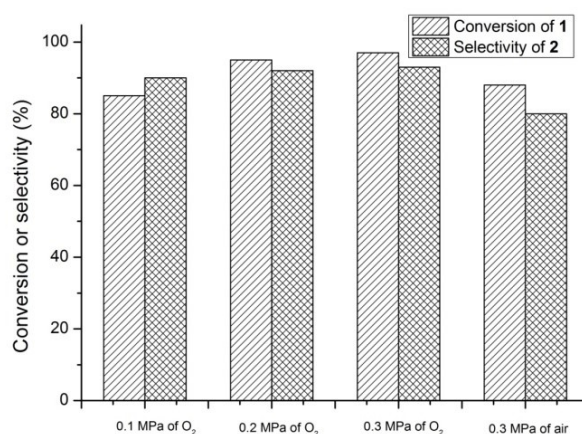

**Figure S7.** The influence of oxygen pressure (reaction conditions: 0.1 g of **1**, 50 mg of VO<sub>x</sub>/ZnO catalyst, in 10 mL methanol solvent, Xe lamp with a light intensity of 220 mW/cm<sup>2</sup>, for 8 h)

### 3. Results of control experiments for oxidative cleavage reaction of **1** with VO<sub>x</sub> in methanol

**Table S2.** The results of control experiments to study the mechanism [a]

| Entry | Additive                      | Conv. (%) <sup>[b]</sup> | Product distribution <sup>[b]</sup> |                   |
|-------|-------------------------------|--------------------------|-------------------------------------|-------------------|
|       |                               |                          | <b>2</b>                            | <b>3+5+others</b> |
| 1     | Silver nitrate                | 52                       | 15                                  | 85                |
| 2     | Ammonium oxalate              | 26                       | 32                                  | 68                |
| 3     | <i>p</i> -benzoquinone        | 60                       | 5                                   | 95                |
| 4     | $\beta$ -carotene             | 70                       | -                                   | >99               |
| 5     | Diphenylamine                 | 24                       | 10                                  | 90                |
| 6     | TEMPO                         | 32                       | <1                                  | >99               |
| 7     | TEMPO+ <i>p</i> -benzoquinone | <3                       | -                                   | >98               |

[a] Reaction conditions: 0.1 g of compound **1**, 50 mg of VO<sub>x</sub>, in 10 mL CH<sub>3</sub>OH, under 0.2 MPa of O<sub>2</sub>, Xe lamp with a light intensity of 200 mW, 5 h; [b] The results are obtained by GC with internal standard technique.

### 4. The possible reaction mechanism for the oxidative cleavage process with the VO<sub>x</sub>/ZnO photocatalyst

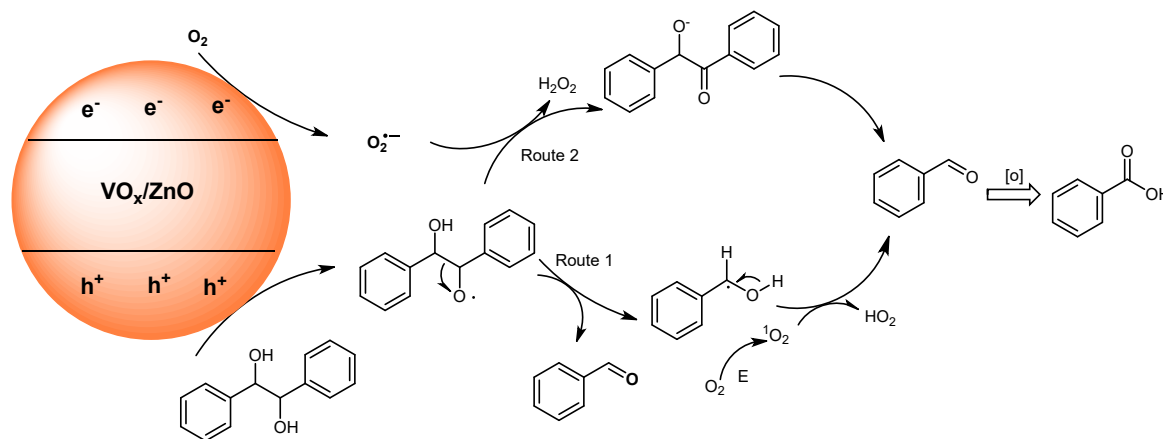

**Figure S8.** Proposed reaction mechanism for oxidative cleavage process of **1** under the oxygen atmosphere

## 5. The results of oxidative cleavage process compared with the previous works

**Table S3.** The compared results for the oxidative cleavage process of hydrobenzoin

| Reaction conditions                                                                                                                                                      | Conv.(%) <sup>l</sup><br>l | Product Distribution(%) <sup>l</sup><br>l |              | Ref.                                         |
|--------------------------------------------------------------------------------------------------------------------------------------------------------------------------|----------------------------|-------------------------------------------|--------------|----------------------------------------------|
|                                                                                                                                                                          |                            | Benzaldehyde                              | Benzoic acid |                                              |
| AgOTf, NaOMe (3 equiv.)<br>37 °C, 12 h                                                                                                                                   | >99                        | 96                                        | -            | Angew. Chem. Int. Ed.,<br>2018, 57, 2616     |
| Vanadium complex, in toluene<br>solvent, 0.7 h, 100 °C,<br>CeCl <sub>3</sub> • 7 H <sub>2</sub> O, TBACl<br>(50mol%), in CH <sub>3</sub> CN solvent,<br>LED 455 nm, 18 h | 99                         | 99                                        | -            | Adv. Synth. Catal. 2018,<br>360, 3286        |
| Na-Mn-LMO (1%Mn), O <sub>2</sub> 1-<br>butanol<br>100 °C, 1 h                                                                                                            | >99                        | 85                                        | -            | Chem. Commun., 2019, 55,<br>486              |
| EcoMnOx (10%Mn) O <sub>2</sub> 1-<br>butanol<br>100 °C, 1 h                                                                                                              | 99                         | >99                                       | -            | Angew. Chem. Inter. Ed.,<br>2017, 56, 9561   |
| CN 620, visible light<br>2wt%CTAB/H <sub>2</sub> O O <sub>2</sub> (1atm)                                                                                                 | 98                         | 99                                        | -            | ACS Sustainable Chem.<br>Eng., 2017, 5, 3214 |
| VO <sub>x</sub> /ZnO, visible light<br>O <sub>2</sub> , CH <sub>3</sub> OH 10 h                                                                                          | >99                        | 75                                        | -            | Green Chem., 2020, 22,<br>5042               |
| VO <sub>x</sub> , visible light<br>O <sub>2</sub> , CH <sub>2</sub> Cl <sub>2</sub> 5 h                                                                                  | 100                        | 91                                        | -            | This work                                    |
|                                                                                                                                                                          | 99                         | -                                         | 100          | This work                                    |

As shown in Table S3, the previous researches provide the technology for either the production of aldehyde or as the generation of ester (or acid) from vicinal diols with the suitable catalysts; however, the regulation and controlling of product selectivity is not enough to carry out and understand the oxidative cleavage of 1, 2-diols from the catalytic method. This work presents a novel, mild and adjustable oxidative cleavage process of C-C bond using the vanadium oxide-based photocatalysts. In case of the oxidative transformation of hydrobenzoin, a complete conversion with 91% selectivity of benzaldehyde was obtained in methanol using the VO<sub>x</sub>/ZnO as catalyst, and 99% conversion in 100% selectivity of benzoic acid was attained with the VO<sub>x</sub> as the catalyst in dichloromethane solvent.

## 6. The photocatalytic oxidative cleavage reactions of different vicinal diols

**Table S4.** The oxidative transformations of different 1, 2-diols with VO<sub>x</sub>/ZnO as catalyst <sup>[a]</sup>

| Entry            | The substrate | product | Conversion (%) <sup>[b]</sup> | Select. (%) <sup>[b]</sup> |
|------------------|---------------|---------|-------------------------------|----------------------------|
| 1                |               |         | 15.0                          | 97                         |
| 2                |               |         | 5.8                           | 90                         |
| 3                |               |         | 85                            | 93                         |
| 4                |               |         | 90                            | 91                         |
| 5 <sup>[c]</sup> |               |         | 62                            | 92                         |
| 6 <sup>[c]</sup> |               |         | 26                            | 90                         |
| 7 <sup>[c]</sup> |               |         | 55                            | 91                         |

<sup>[a]</sup>Reaction conditions: 0.1 g substrate, 50 mg of VO<sub>x</sub>/ZnO photocatalyst, in 10 mL methanol, under 0.2 MPa of O<sub>2</sub>, Xe lamp with a light intensity of 220 mW/cm<sup>2</sup>, for 8 h. <sup>[b]</sup>The results are obtained by GC with internal standard technique. <sup>[c]</sup>Reaction was performed at the conditions of Xe lamp with a light intensity of 220 mW/cm<sup>2</sup> under 0.2 MPa of O<sub>2</sub> for 3 h.

## 7. The GC and GC-MS spectra of reaction products

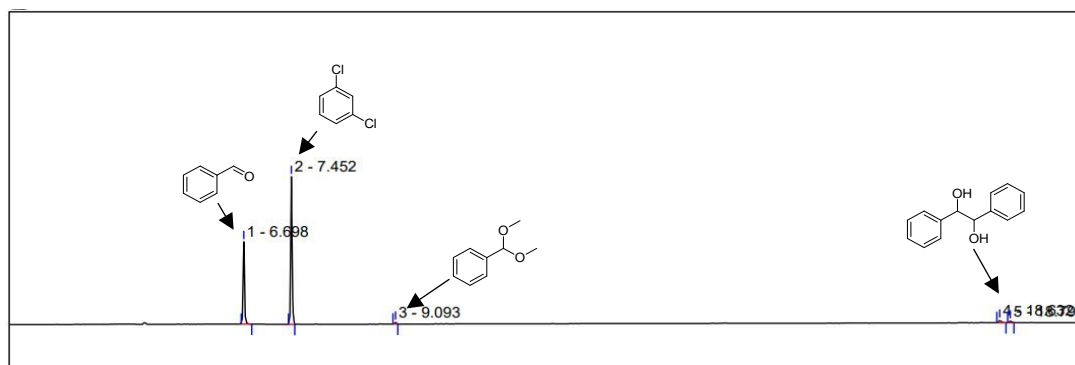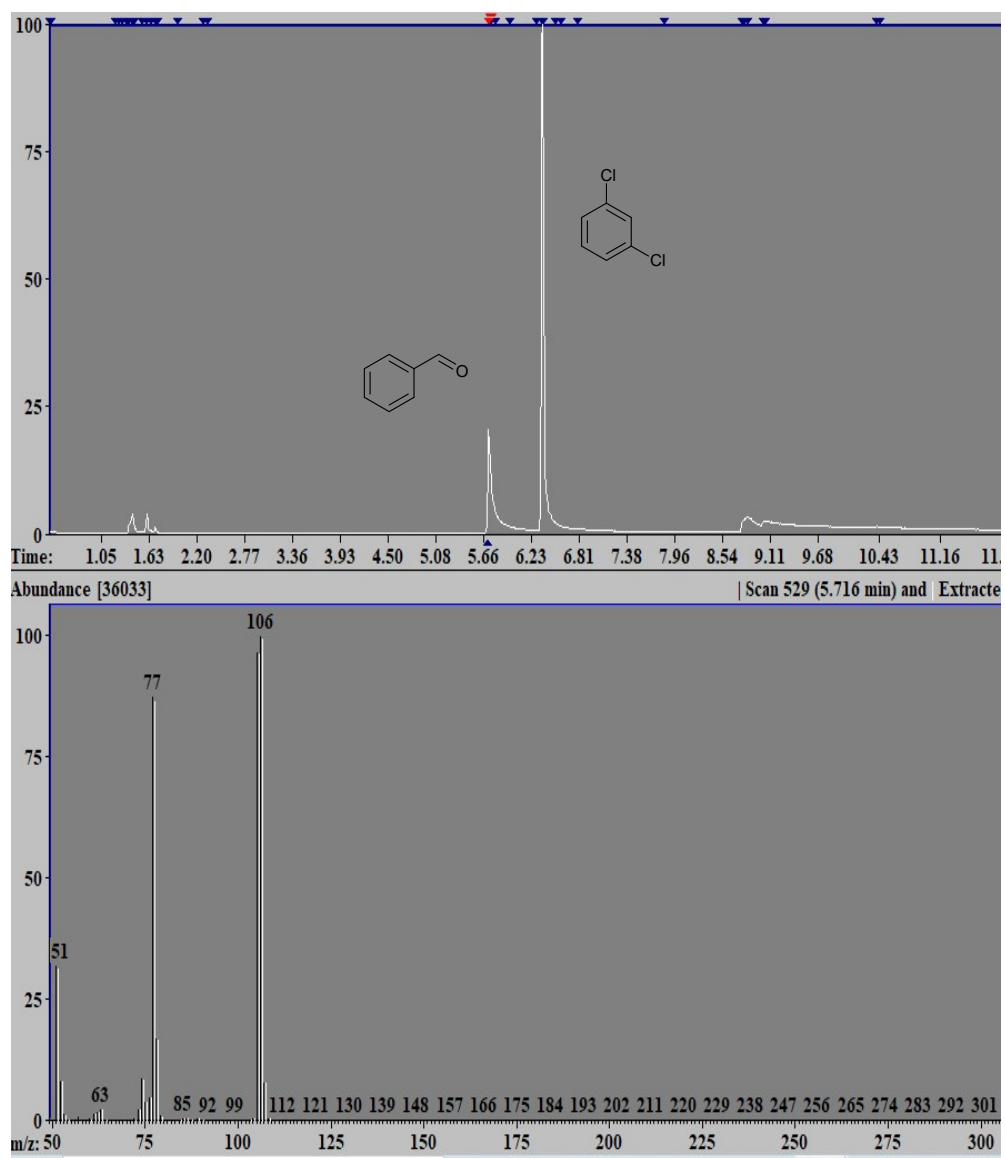

**Figure S9.** The GC and GC-MS spectra for oxidative cleavage of hydrobenzoin with  $\text{VO}_x/\text{ZnO}$

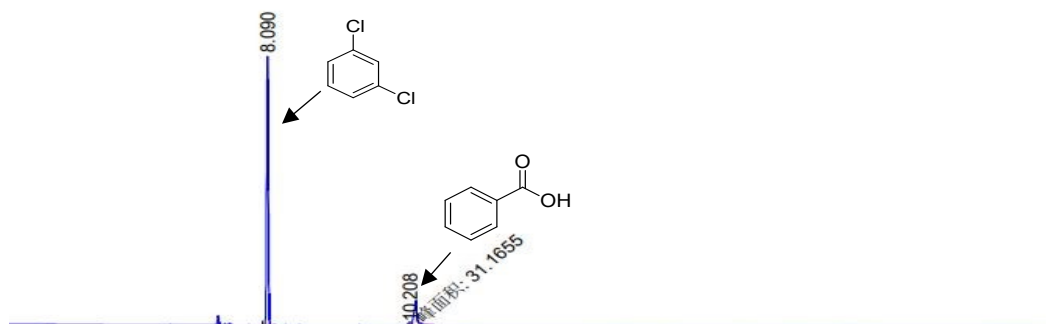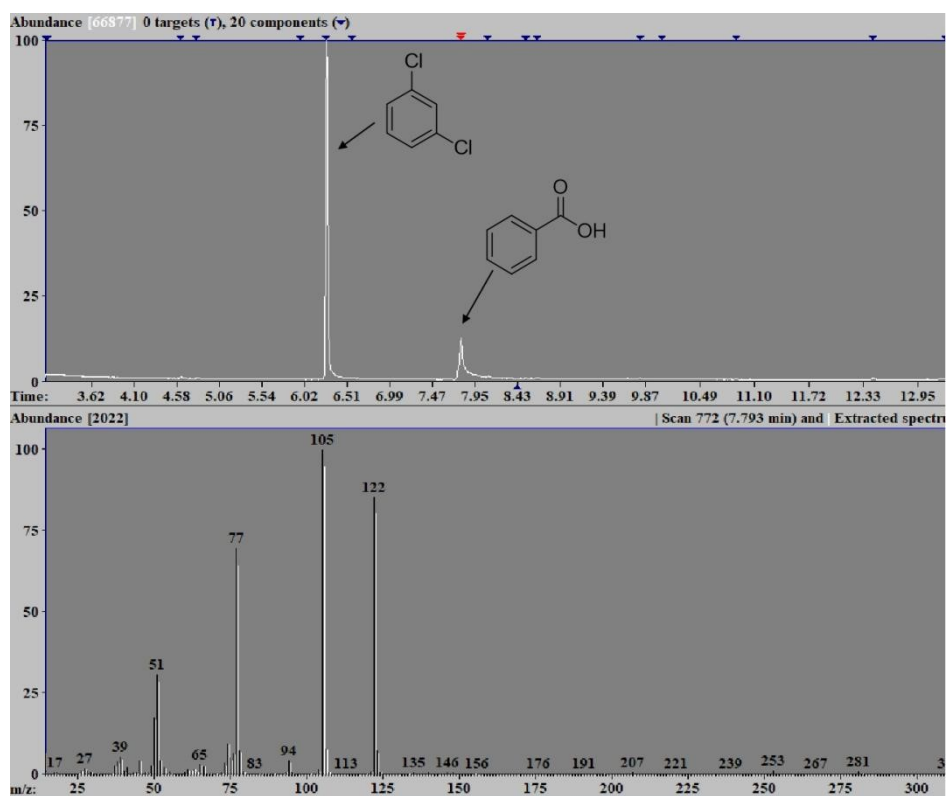

Figure S10. The GC and GC-MS spectra for oxidative cleavage of hydrobenzoin with  $\text{VO}_x$  catalyst
